# Supplementary material for: High-Efficacy Therapies for Treatment-Naïve Individuals with Relapsing–Remitting Multiple Sclerosis
Source: Springer Nature journal article supplement (doi:10.1007/s40263-022-00965-7), 2022-11-09
Supplement: MOESM1 [file 24116628]

## **High-Efficacy Therapies for Treatment-Naïve Individuals with Relapsing-Remitting Multiple Sclerosis**

Léorah Freeman,<sup>1</sup> Erin E. Longbrake,<sup>2</sup> Patricia K. Coyle,<sup>3</sup> Barry Hendin,<sup>4</sup> Timothy Vollmer<sup>5</sup>

<sup>1</sup>*Department of Neurology, Dell Medical School, The University of Texas at Austin, TX, USA;*

<sup>2</sup>*Department of Neurology, Yale University, New Haven, CT, USA;* <sup>3</sup>*Department of Neurology, Stony Brook University Medical Center, Stony Brook, NY, USA;* <sup>4</sup>*Banner - University Medicine Neurosciences Clinic, Phoenix, AZ, USA;* <sup>5</sup>*Department of Neurology, University of Colorado, Anschutz Medical Campus, Aurora, CO, USA.*

### **Corresponding author and address:**

Léorah Freeman, MD, PhD

Health Discovery Building, Dell Medical School, The University of Texas at Austin, 1601 Trinity St, Austin, TX, 78701, USA.

[Leorah.Freeman@austin.utexas.edu](mailto:Leorah.Freeman@austin.utexas.edu)

**Journal:** CNS Drugs

**Supplementary Table 1. Efficacy and safety data in pivotal Phase 3 trials for high-efficacy therapies with active comparators of lower efficacy.**

|                                                         | ASCLEPIOS I & II                                              |                                         | OPERA I & II                                           |                                           | CARE-MS I            |                               | CARE MS-II                                                           |                                  |
|---------------------------------------------------------|---------------------------------------------------------------|-----------------------------------------|--------------------------------------------------------|-------------------------------------------|----------------------|-------------------------------|----------------------------------------------------------------------|----------------------------------|
|                                                         | Ofatumumab<br>ASCLEPIOS I:<br>N=465<br>ASCLEPIOS II:<br>N=481 | Teriflunomide<br>(RG)<br>N=462<br>N=474 | Ocrelizumab<br>OPERA I:<br>N=410<br>OPERA II:<br>N=417 | IFN $\beta$ -1a<br>(RG)<br>N=411<br>N=418 | Alemtuzumab<br>N=376 | IFN $\beta$ -1a (RG)<br>N=187 | Alemtuzumab<br>12 mg<br>N=426                                        | IFN $\beta$ -1a<br>(RG)<br>N=202 |
| <b>Baseline characteristics</b>                         |                                                               |                                         |                                                        |                                           |                      |                               |                                                                      |                                  |
| <b>MS phenotype</b>                                     | RMS                                                           |                                         | RMS                                                    |                                           | Treatment-naïve RRMS |                               | RRMS patients with $\geq 1$ relapse on IFN $\beta$ -1a or glatiramer |                                  |
| <b>Treatment duration</b>                               | Up to 30 months                                               |                                         | 96 weeks                                               |                                           | 2 years              |                               | 2 years                                                              |                                  |
| <b>Relapses in year prior to study entry, mean (SD)</b> | 1.2-1.3 (0.6-0.7)                                             | 1.3 (0.7)                               | 1.31-1.32 (0.65-0.69)                                  | 1.33-1.34 (0.64-0.73)                     | 1.8 (0.8)            | 1.8 (0.8)                     | 1.7 (0.86)                                                           | 1.5 (0.75)                       |
| <b>Age, years, mean (SD)</b>                            | 38.0-38.9 (8.8-9.3)                                           | 37.8-38.2 (9.0-9.5)                     | 37.1-37.2 (9.1-9.3)                                    | 36.9-37.4 (9.0-9.3)                       | 33.0 (8.0)           | 33.2 (8.5)                    | 35.1 (8.40)                                                          | 35.8 (8.77)                      |
| <b>Disease duration, years, mean (SD)</b>               | 8.20-8.36 (6.84-7.40)*                                        | 8.18-8.19 (7.21-7.38)*                  | 6.72-6.74 (6.10-6.37)*                                 | 6.25-6.68 (5.98-6.13)*                    | 2.1 (1.4)†           | 2.0 (1.3)†                    | 1.7 (0.86)‡                                                          | 1.5 (0.75)                       |
| <b>EDSS, mean (SD)</b>                                  | 2.90-2.97 (1.34-1.36)                                         | 2.86-2.94 (1.36-1.37)                   | 2.78-2.86 (1.24-1.30)                                  | 2.75-2.84 (1.29-1.38)                     | 2.0 (0.8)            | 2.0 (0.8)                     | 2.7 (1.26)                                                           | 2.7 (1.21)                       |
| <b>Efficacy results</b>                                 |                                                               |                                         |                                                        |                                           |                      |                               |                                                                      |                                  |
| <b>ARR (95% CI)</b>                                     | 0.10-0.11 (0.08-0.09 to 0.13-0.14)                            | 0.22-0.25 (0.18-0.21 to 0.26-0.30)      | 0.16 (0.12 to 0.20)                                    | 0.29 (0.23-0.24 to 0.36)                  | 0.18 (0.13 to 0.23)  | 0.39 (0.29 to 0.53)           | 0.26 (0.21 to 0.33)                                                  | 0.52 (0.41 to 0.66)              |

|                                                        | ASCLEPIOS I & II                                                                                       |                                         | OPERA I & II                                                               |                                           | CARE-MS I                                                          |                               | CARE MS-II                                                            |                                  |
|--------------------------------------------------------|--------------------------------------------------------------------------------------------------------|-----------------------------------------|----------------------------------------------------------------------------|-------------------------------------------|--------------------------------------------------------------------|-------------------------------|-----------------------------------------------------------------------|----------------------------------|
|                                                        | Ofatumumab<br>ASCLEPIOS I:<br>N=465<br>ASCLEPIOS II:<br>N=481                                          | Teriflunomide<br>(RG)<br>N=462<br>N=474 | Ocrelizumab<br>OPERA I:<br>N=410<br>OPERA II:<br>N=417                     | IFN $\beta$ -1a<br>(RG)<br>N=411<br>N=418 | Alemtuzumab<br>N=376                                               | IFN $\beta$ -1a (RG)<br>N=187 | Alemtuzumab<br>12 mg<br>N=426                                         | IFN $\beta$ -1a<br>(RG)<br>N=202 |
|                                                        | Rate ratio (95% CI), p-value:<br>0.42-0.49 (0.31-0.37 to 0.56-0.65),<br>p<0.001                        |                                         | Rate ratio (95% CI), p-value:<br>0.53-0.54 (0.40 to 0.71-0.72),<br>p<0.001 |                                           | Rate ratio (95% CI), p-value:<br>0.45 (0.32 to 0.63), p<0.0001     |                               | Rate ratio (95% CI), p-value:<br>0.51 (0.39 to 0.65), p<0.0001        |                                  |
| <b>Disability progression/<br/>worsening confirmed</b> | At 3 month, K-M estimate at 24 months:<br>10.9%                                                        | 15.0%                                   | At 12 weeks, % pts with event:<br>9.1%                                     | 13.6%                                     | Sustained disability accumulation confirmed over 6 months:<br>8.0% | 11.1%                         | Sustained disability accumulation confirmed over 6 months:<br>12.7%   | 21.1%                            |
|                                                        | At 6 month:<br>8.1%                                                                                    | 12.0%                                   | At 24 weeks:<br>6.9%                                                       | 10.5%                                     |                                                                    |                               |                                                                       |                                  |
|                                                        | HR (95% CI), p-value:<br>0.66-0.68 (0.50 to 0.86-0.92), p≤0.01                                         |                                         | HR (95% CI), p-value:<br>0.60 (0.43-0.45 to 0.81-0.84),<br>p≤0.003         |                                           | HR (95% CI), p-value:<br>0.70 (0.40 to 1.23), p=0.22               |                               | HR (95% CI), p-value:<br>0.58 (0.38 to 0.87), p=0.008                 |                                  |
| <b>Disability improvement confirmed</b>                | At 6 month, K-M estimate at 24 months:<br>11.0%                                                        | 8.1%                                    | At 12 weeks, % pts with event:<br>20.7%                                    | 15.6%                                     | NA                                                                 | NA                            | Sustained reduction for 6 months (95% CI):<br>28.82% (24.18 to 34.13) | 12.93% (8.34 to 19.77)           |
|                                                        | HR (95% CI), p-value:<br>1.35 (0.95 to 1.92), p=0.09                                                   |                                         | Difference, p-value:<br>33%, p=0.02                                        |                                           | NA                                                                 |                               |                                                                       |                                  |
| <b>% pts achieving NEDA</b>                            | 1 year: 47.0<br>2 years: 87.8                                                                          | 24.5<br>48.2                            | By 96 weeks:<br>47.5-47.9                                                  | 25.1-29.2                                 | NA                                                                 | NA                            | NA                                                                    | NA                               |
|                                                        | OR (95% CI), p-value<br>1 year: 3.36 (2.67 to 4.21), p<0.001<br>2 years: 8.09 (6.26 to 10.45), p<0.001 |                                         | Difference (95% CI), p-value:<br>64-89% (36-54 to 98-132),<br>p<0.001      |                                           | NA                                                                 |                               | NA                                                                    |                                  |

|                                                    | ASCLEPIOS I & II                                                                |                                         | OPERA I & II                                                                           |                                           | CARE-MS I                                                                                 |                               | CARE MS-II                                                                               |                                  |
|----------------------------------------------------|---------------------------------------------------------------------------------|-----------------------------------------|----------------------------------------------------------------------------------------|-------------------------------------------|-------------------------------------------------------------------------------------------|-------------------------------|------------------------------------------------------------------------------------------|----------------------------------|
|                                                    | Ofatumumab<br>ASCLEPIOS I:<br>N=465<br>ASCLEPIOS II:<br>N=481                   | Teriflunomide<br>(RG)<br>N=462<br>N=474 | Ocrelizumab<br>OPERA I:<br>N=410<br>OPERA II:<br>N=417                                 | IFN $\beta$ -1a<br>(RG)<br>N=411<br>N=418 | Alemtuzumab<br>N=376                                                                      | IFN $\beta$ -1a (RG)<br>N=187 | Alemtuzumab<br>12 mg<br>N=426                                                            | IFN $\beta$ -1a<br>(RG)<br>N=202 |
| <b># new or enlarged T2 lesions, mean (95% CI)</b> | 0.64-0.72 (0.55-0.61 to 0.75-0.85)                                              | 4.00-4.15 (3.47-3.64 to 4.61-4.74)      | 0.32-0.33 (0.26 to 0.41)                                                               | 1.41-1.90 (1.12-1.54 to 1.78-2.36)        | % pts new or enlarged T2 lesions:<br>48%                                                  | 58%                           | % pts new or enlarged T2 lesions:<br>46%                                                 | 68%                              |
|                                                    | Rate ratio (95% CI), p-value:<br>0.15-0.18 (0.13-0.15 to 0.19-0.22),<br>p<0.001 |                                         | Rate ratio (95% CI), p-value:<br>0.17-0.23 (0.13-0.17 to 0.23-0.30), p<0.001           |                                           | Rate ratio (95% CI), p-value:<br>NA (NA), p=0.04                                          |                               | Rate ratio (95% CI), p-value:<br>NA (NA), p<0.0001                                       |                                  |
| <b>% brain volume reduction</b>                    | Annual rate of change (95% CI):<br>-0.29 to -0.28 (-0.35--0.34 to -0.23--0.22)  | -0.35 (-0.42--0.41 to -0.29)            | Mean % change (95% CI) from Week 24-96:<br>-0.64 to -0.57 (-0.73--0.66 to -0.54--0.49) | -0.75--0.74 (-0.85--0.83 to -0.65)        | Median change in brain parenchymal fraction (IQR), p-value:<br>-0.867% (-1.470 to -0.254) | -1.488% (-2.355 to -0.567)    | Median change in brain parenchymal fraction (IQR), p-value:<br>-0.615% (-1.299 to 0.006) | -0.810% (-1.539 to 0.203)        |
|                                                    | % points, (95% CI), p-value:<br>0.07 (-0.02 to 0.15), p=0.12-0.13               |                                         | OPERA I: 22.8%, p=0.004<br>OPERA II: 14.9%, p=0.09                                     |                                           | p<0.0001                                                                                  |                               | p=0.010                                                                                  |                                  |
| <b>Safety results, n (%)</b>                       |                                                                                 |                                         |                                                                                        |                                           |                                                                                           |                               |                                                                                          |                                  |
| <b>Patients with <math>\geq</math>1 AE</b>         | 382-409 (82.2-85.0)                                                             | 380-408 (82.3-86.1)                     | 327-360 (80.1-86.3)                                                                    | 331-357 (80.9-85.6)                       | 361 (96)                                                                                  | 172 (92)                      | 428 (98)                                                                                 | 191 (95)                         |
| <b>Discontinuation due to AE</b>                   | 27 (5.6-5.8)                                                                    | 24-25 (5.2-5.3)                         | 13-16 (3.2-3.8)                                                                        | 25-26 (6.0-6.4)                           | 5 (1)                                                                                     | 11 (6)                        | 14 (3)                                                                                   | 15 (7)                           |
| <b>Serious AEs</b>                                 | 38-48 (7.9-10.3)                                                                | 36-38 (7.6-8.2)                         | 28-29 (6.9-7.0)                                                                        | 32-40 (7.8-9.6)                           | 69 (18)                                                                                   | 27 (14)                       | 85 (20)                                                                                  | 44 (22)                          |

|                     | ASCLEPIOS I & II                                              |                                         | OPERA I & II                                           |                                           | CARE-MS I            |                               | CARE MS-II                    |                                  |
|---------------------|---------------------------------------------------------------|-----------------------------------------|--------------------------------------------------------|-------------------------------------------|----------------------|-------------------------------|-------------------------------|----------------------------------|
|                     | Ofatumumab<br>ASCLEPIOS I:<br>N=465<br>ASCLEPIOS II:<br>N=481 | Teriflunomide<br>(RG)<br>N=462<br>N=474 | Ocrelizumab<br>OPERA I:<br>N=410<br>OPERA II:<br>N=417 | IFN $\beta$ -1a<br>(RG)<br>N=411<br>N=418 | Alemtuzumab<br>N=376 | IFN $\beta$ -1a (RG)<br>N=187 | Alemtuzumab<br>12 mg<br>N=426 | IFN $\beta$ -1a<br>(RG)<br>N=202 |
| <b>Reference(s)</b> | <a href="#">[1, 2]</a>                                        |                                         | <a href="#">[3, 4]</a>                                 |                                           | <a href="#">[5]</a>  |                               | <a href="#">[6, 7]</a>        |                                  |

Not intended to compare across trials. Data presented as presented in reference(s). Numbers shown in ranges indicate data from two trials for ASCLEPIOS and OPERA; data of pooled analysis of two trials (I/II for each) are shown where available.

\*Time since symptom onset.

ARR, annualized relapse rate; BPF, brain parenchymal fraction; CI, confidence interval; EDSS, Expanded Disability Status Scale; HR, hazard ratio; IFN $\beta$ -1a, interferon  $\beta$ -1a; K-M, Kaplan–Meier; NA, not available; NEDA-3, No Evidence of Disease Activity-3; OR, odds ratio; RMS, relapsing multiple sclerosis; RG, Reference Group, SD, standard deviation.

Supplementary Table 2. Efficacy and safety data in placebo-controlled pivotal Phase 3 trials of high-efficacy therapies.

|                                                                  | AFFIRM                                                                 |                                            | CLARITY                                                                     |                          | ORACLE MS                                                                 |                                |
|------------------------------------------------------------------|------------------------------------------------------------------------|--------------------------------------------|-----------------------------------------------------------------------------|--------------------------|---------------------------------------------------------------------------|--------------------------------|
|                                                                  | Natalizumab<br>N=627                                                   | Placebo (RG)<br>N=315                      | Cladribine<br>3.5 mg/kg<br>N=433                                            | Placebo<br>(RG)<br>N=437 | Cladribine<br>3.5 mg/kg<br>N=206                                          | Placebo (RG)<br>N=206          |
| <b>Baseline characteristics</b>                                  |                                                                        |                                            |                                                                             |                          |                                                                           |                                |
| <b>MS phenotype</b>                                              | RMS                                                                    |                                            | RRMS                                                                        |                          | Clinically definite MS patients with a first clinical demyelinating event |                                |
| <b>Treatment duration</b>                                        | Up to 116 weeks                                                        |                                            | 96 weeks                                                                    |                          | 96 weeks                                                                  |                                |
| <b>Relapses in year prior to study entry, mean (SD)</b>          | 1.53 (0.91)                                                            | 1.50 (0.77)                                | NA (NA)                                                                     | NA (NA)                  | NA (NA)                                                                   | NA (NA)                        |
| <b>Age, years, mean (SD)</b>                                     | 35.6 (8.5)                                                             | 36.7 (7.8)                                 | 37.9 (10.3)                                                                 | 38.7 (9.9)               | 31.7 (9.1)                                                                | 32.2 (8.2)                     |
| <b>Disease duration, years, mean (SD) except where indicated</b> | Median (range):<br>5.0 (0 to 34)                                       | Median (range):<br>6.0 (0 to 33)           | 7.9 (7.2)                                                                   | 8.9 (7.4)                | NA                                                                        | NA                             |
| <b>EDSS, mean (SD) except where indicated</b>                    | 2.3 (1.2)                                                              | 2.3 (1.2)                                  | 2.8 (1.2)                                                                   | 2.9 (1.3)                | Median (IQR)<br>1.5 (1.0–2.0)                                             | Median (IQR):<br>1.5 (1.0–2.0) |
| <b>Efficacy results</b>                                          |                                                                        |                                            |                                                                             |                          |                                                                           |                                |
| <b>ARR (95% CI)</b>                                              | 1 year: 0.27 (0.21 to 0.33)<br>2 years: 0.23 (0.19 to 0.28)            | 0.78 (0.64 to 0.94)<br>0.73 (0.62 to 0.87) | 0.14 (0.12 to 0.17)                                                         | 0.33 (0.29 to 0.38)      | NA (NA)                                                                   | NA (NA)                        |
|                                                                  | Rate ratio (95% CI), p-value:<br>NA (NA), p<0.001                      |                                            | Rate ratio (95% CI), p-value:<br>NA (NA), p<0.001                           |                          | Rate ratio (95% CI), p-value:<br>NA (NA), p<0.001                         |                                |
| <b>Disability progression/worsening confirmed</b>                | Cumulative probability of sustained disability progression at 2 years: |                                            | Relative reduction in the risk of 3-month sustained disability progression: |                          | NA                                                                        | NA                             |

|                                                    | AFFIRM                                                                 |                          | CLARITY                                               |                          | ORACLE MS                                                         |                       |
|----------------------------------------------------|------------------------------------------------------------------------|--------------------------|-------------------------------------------------------|--------------------------|-------------------------------------------------------------------|-----------------------|
|                                                    | Natalizumab<br>N=627                                                   | Placebo (RG)<br>N=315    | Cladribine<br>3.5 mg/kg<br>N=433                      | Placebo<br>(RG)<br>N=437 | Cladribine<br>3.5 mg/kg<br>N=206                                  | Placebo (RG)<br>N=206 |
|                                                    | 17%                                                                    | 29%                      | 33%                                                   |                          |                                                                   |                       |
|                                                    | HR (95% CI), p-value:<br>0.58 (0.43 to 0.77), p<0.001                  |                          | HR (95% CI), p-value:<br>0.67 (0.48 to 0.93), p=0.02  |                          | NA                                                                |                       |
| <b>Disability improvement confirmed</b>            | NA                                                                     | NA                       | NA                                                    | NA                       | NA                                                                | NA                    |
|                                                    | NA                                                                     |                          | NA                                                    |                          | NA                                                                |                       |
| <b>% pts achieving NEDA</b>                        | Over 2 years:<br>41                                                    | 8                        | 44.3*                                                 | 15.8*                    | NA                                                                | NA                    |
|                                                    | Absolute difference (95% CI), p-value:<br>32.4% (27.4–37.4%), p<0.0001 |                          | OR (95% CI), p-value<br>4.28 (3.05 to 6.02), p<0.0001 |                          | NA                                                                |                       |
| <b># new or enlarged T2 lesions, mean (95% CI)</b> | 1 year: 1.2 (4.7)<br>2 years: 1.9 (9.2)                                | 6.1 (9.0)<br>11.0 (15.7) | Mean (95% CI):<br>0.38 (NA)                           | 1.43 (NA)                | Median cumulative number of lesions (IQR):<br>0.0 (0.0 to 2.0)    | 2.0 (0.0 to 8.0)      |
|                                                    | Rate ratio (95% CI), p-value:<br>NA (NA), p<0.001                      |                          | Rate ratio (95% CI), p-value:<br>NA (NA), p<0.001     |                          | Rate ratio (95% CI), p-value:<br>0.212 (0.152 to 0.295), p<0.0001 |                       |
| <b>% brain volume reduction</b>                    | Mean % reduction in BPF<br>Over 1 year:<br>-0.56                       | -0.40                    | Annual PBVC, mean (SD):<br>-0.56 (0.68)               | -0.70 (0.79)             | NA                                                                | NA                    |
|                                                    | Over 2 years:<br>-0.80                                                 | -0.82                    | p=0.010                                               |                          | NA                                                                |                       |
|                                                    | Over 1 year: p=0.002<br>Over 2 years: p=0.822                          |                          |                                                       |                          |                                                                   |                       |
| <b>Safety results, n (%)</b>                       |                                                                        |                          |                                                       |                          |                                                                   |                       |

|                                             | AFFIRM               |                       | CLARITY                          |                          | ORACLE MS                        |                       |
|---------------------------------------------|----------------------|-----------------------|----------------------------------|--------------------------|----------------------------------|-----------------------|
|                                             | Natalizumab<br>N=627 | Placebo (RG)<br>N=315 | Cladribine<br>3.5 mg/kg<br>N=433 | Placebo<br>(RG)<br>N=437 | Cladribine<br>3.5 mg/kg<br>N=206 | Placebo (RG)<br>N=206 |
| <b>Patients with <math>\geq 1</math> AE</b> | 596 (95)             | 300 (96)              | 347 (80.7)                       | 319 (73.3)               | 168 (82)                         | 162 (79)              |
| <b>Discontinuation due to AE</b>            | 37 (6)               | 12 (4)                | 15 (3.5)                         | 9 (2.1)                  | 10 (5)                           | 4 (2)                 |
| <b>Serious AEs</b>                          | 119 (19)             | 75 (24)               | 36 (8.4)                         | 28 (6.4)                 | 23 (11)                          | 21 (10)               |
| <b>Reference(s)</b>                         | [8-11]               |                       | [12-14]                          |                          | [15]                             |                       |

Not intended to compare across trials. Data presented as presented in reference(s). Numbers shown in ranges indicate data from two trials for ASCLEPIOS and OPERA; data of pooled analysis of two trials (I/II for each) are shown where available.

\*Time since symptom onset.

ARR, annualized relapse rate; BPF, brain parenchymal fraction; CI, confidence interval; EDSS, Expanded Disability Status Scale; HR, hazard ratio; IFN $\beta$ -1a, interferon  $\beta$ -1a; K-M, Kaplan–Meier; NA, not available; NEDA-3, No Evidence of Disease Activity-3; OR, odds ratio; RMS, relapsing multiple sclerosis; RG, Reference Group, SD, standard deviation.

**Supplementary Table 3. Long-term open-label extension (OLE) studies for high-efficacy therapies with active comparators of lower efficacy.**

|                                              | <b>Ofatumumab</b>                                            | <b>Ocrelizumab</b>                    | <b>Alemtuzumab</b>                                |
|----------------------------------------------|--------------------------------------------------------------|---------------------------------------|---------------------------------------------------|
| <b>OLE study name (NCT identifier)</b>       | ALITHIOS (NCT03650114)                                       | OPERA OLE                             | TOPAZ (NCT02255656)                               |
| <b>Included core trial(s)</b>                | ASCLEPIOS (phase 3), 2.5 years<br>APLIOS (phase 2), 12 weeks | OPERA (phase 3), 2 years              | CARE-MS (phase 3), 2 years<br>CAMMS03409, 4 years |
| <b>Comparator in core trial(s), duration</b> | Teriflunomide (in ASCLEPIOS)                                 | IFN $\beta$ -1a                       | IFN $\beta$ -1a (in CARE-MS)                      |
| <b>Duration of OLE</b>                       | up to 5 years                                                | up to 6 years                         | up to 5.6 years                                   |
| <b>n</b>                                     | 2010 (estimated)                                             | 1325                                  | 1062                                              |
| <b>Study completion</b>                      | October 2028 (estimated)                                     | December 2020                         | July 2020                                         |
| <b>Reference(s)</b>                          | NCT03650114                                                  | Interim results: <a href="#">[16]</a> | <a href="#">[17]</a>                              |

**Supplementary References**

1. Hauser SL, Bar-Or A, Cohen JA, Comi G, Correale J, Coyle PK, et al; ASCLEPIOS I and ASCLEPIOS II Trial Groups. Ofatumumab versus teriflunomide in multiple sclerosis. *N Engl J Med*. 2020;383:546–57.
2. Hauser SL, Bar-Or A, Cohen JA, Comi G, Correale J, Coyle PK, et al. Ofatumumab vs teriflunomide in relapsing multiple sclerosis: analysis of no evidence of disease activity (NEDA-3) from ASCLEPIOS I and II trials. *Eur J Neurol*. 2020;27:1289–90.
3. Hauser SL, Bar-Or A, Comi G, Giovannoni G, Hartung HP, Hemmer B, et al; OPERA I and OPERA II Clinical Investigators. Ocrelizumab versus interferon beta-1a in relapsing multiple sclerosis. *N Engl J Med*. 2017;376:221–34.
4. Giovannoni G, Arnold DL, Bar-Or A, Havrdová E, Kappos L, Lublin F, et al. PO129 Neda analysis by epoch in the opera studies of ocrelizumab. *J Neurol Neurosurg Psychiatry*. 2017;88:A46.
5. Cohen JA, Coles AJ, Arnold DL, Confavreux C, Fox EJ, Hartung HP, et al; CARE-MS II investigators. Alemtuzumab versus interferon beta 1a as first-line treatment for patients with relapsing-remitting multiple sclerosis: a randomised controlled phase 3 trial. *Lancet*. 2012;380:1819–28.
6. Coles AJ, Twyman CL, Arnold DL, Cohen JA, Confavreux C, Fox EJ, et al; CARE-MS II investigators. Alemtuzumab for patients with relapsing multiple sclerosis after disease-modifying therapy: a randomised controlled phase 3 trial. *Lancet*. 2012;380:1829–39.
7. Coles AJ, Cohen JA, Fox EJ, Giovannoni G, Hartung HP, Havrdova E, et al; CARE-MS II and CAMMS03409 Investigators. Alemtuzumab CARE-MS II 5-year follow-up: efficacy and safety findings. *Neurology*. 2017;89:1117–26.

8. Polman CH, O'Connor PW, Havrdova E, Hutchinson M, Kappos L, Miller DH, et al; AFFIRM Investigators. A randomized, placebo-controlled trial of natalizumab for relapsing multiple sclerosis. *N Engl J Med.* 2006;354:899–910.
9. Havrdova E, Galetta S, Hutchinson M, Stefoski D, Bates D, Polman CH, et al. Effect of natalizumab on clinical and radiological disease activity in multiple sclerosis: a retrospective analysis of the Natalizumab Safety and Efficacy in Relapsing-Remitting Multiple Sclerosis (AFFIRM) study. *Lancet Neurol.* 2009;8:254–60.
10. Miller DH, Soon D, Fernando KT, MacManus DG, Barker GJ, Yousry TA, et al; AFFIRM Investigators. MRI outcomes in a placebo-controlled trial of natalizumab in relapsing MS. *Neurology.* 2007;68:1390–401.
11. Phillips JT, Giovannoni G, Lublin FD, O'Connor PW, Polman CH, Willoughby E, et al. Sustained improvement in Expanded Disability Status Scale as a new efficacy measure of neurological change in multiple sclerosis: treatment effects with natalizumab in patients with relapsing multiple sclerosis. *Mult Scler.* 2011;17:970–9.
12. Giovannoni G, Comi G, Cook S, Rammohan K, Rieckmann P, Soelberg Sørensen P, et al. A placebo-controlled trial of oral cladribine for relapsing multiple sclerosis. *N Engl J Med.* 2010;362:416–26.
13. Giovannoni G, Cook S, Rammohan K, Rieckmann P, Sørensen PS, Vermersch P, et al. Sustained disease-activity-free status in patients with relapsing-remitting multiple sclerosis treated with cladribine tablets in the CLARITY study: a post-hoc and subgroup analysis. *Lancet Neurol.* 2011;10:329–37.
14. De Stefano N, Giorgio A, Battaglini M, De Leucio A, Hicking C, Dangond F, et al. Reduced brain atrophy rates are associated with lower risk of disability progression in patients with relapsing multiple sclerosis treated with cladribine tablets. *Mult Scler.* 2018;24:222–6.

15. Leist TP, Comi G, Cree BA, Coyle PK, Freedman MS, Hartung HP, et al; oral cladribine for early MS (ORACLE MS) Study Group. Effect of oral cladribine on time to conversion to clinically definite multiple sclerosis in patients with a first demyelinating event (ORACLE MS): a phase 3 randomised trial. *Lancet Neurol.* 2014;13:257–67.
16. Hauser SL, Kappos L, Arnold DL, Bar-Or A, Brochet B, Naismith RT, et al. Five years of ocrelizumab in relapsing multiple sclerosis: OPERA studies open-label extension. *Neurology.* 2020;95:e1854–67.
17. Coles AJ, Arnold DL, Bass AD, Boster AL, Compston DAS, Fernández Ó, et al. Efficacy and safety of alemtuzumab over 6 years: final results of the 4-year CARE-MS extension trial. *Ther Adv Neurol Disord.* 2021;14:1756286420982134.
